# Supplementary material for: The neuroprotective effects of Tao-Ren-Cheng-Qi Tang against embolic stroke in rats
Source: Springer Nature journal article supplement (doi:10.1186/s13020-017-0128-y), 2017-01-31
Supplement: MOESM1 [file 12035566]

臺北醫學大學動物實驗管理小組審查同意書  
Affidavit of Approval of Animal Use Protocol  
Taipei Medical University

動物實驗申請表暨同意書編號：LAC-100-0092

計畫申請人：許準榕 職稱：教授  
單位：醫學科學研究所 飼養/應用地點：動物中心/解剖學科灌流室  
計畫名稱：桃仁承氣湯及三黃瀉心湯併用 aspirin 治療缺血性腦中風及降低神經行為缺陷之交互作用與引起胃出血、顱內出血、蜘蛛膜下腔出血之風險評估

本計畫之「動物實驗申請表」業經動物實驗管理小組  實質  形式審查通過。  
本計畫預定飼養應用之動物如下：

| 動物種類       | 動物數量           | 計畫執行期間                |
|------------|----------------|-----------------------|
| rat/wistar | 380 x2 = 760 隻 | 101年02月23日至102年12月15日 |
| mice/ICR   | 144 隻          |                       |

The animal use protocol listed below has been reviewed and approved by the Institutional Animal Care and Use Committee (IACUC).

Protocol Title: Comparative studies of Tao-Ren-Cheng-Qi Tang or San-Huang-Xie-Xin Tang with aspirin on neuroprotection and lowering the neurobehavioral deficits in rat ischemic stroke: evaluation the risks of inducing gastric bleeding, intracerebral hemorrhage, and subarachnoid hemorrhage.

IACUC Approval No: \_\_\_\_\_

Period of Protocol: Valid From: 02/23/2012 To: 12/15/2014 (mm/dd/yyyy)

Principle Investigator (PI): Joen-Rong Sheu

動物實驗管理小組召集人  日期 3/5/2012  
IACUC Chairman  Date 3/5/2012
